# Supplementary material for: Addressing the Phenomenon of Overtourism in Budapest from Multiple Angles Using Unconventional Methodologies and Data
Source: MDPI journal article supplement (doi:10.3390/su14042268), 2022-02-16
Supplement: s1 [file s1]

## Supplementary Material

### Addressing the phenomenon of overtourism in Budapest from multiple angles using unconventional methodologies and data

Betsabé Pérez Garrido, Szabolcs Szilárd Sebrek, Viktoriia Semenova, Damla Bal and Michalkó Gabor

**Table S1.** Tourism density and intensity in Budapest and its districts, 2019. Source: HCSO, calculations by authors.

| Region                  | Bed-nights        | Estimated area (km2) | Estimated number of residents | Tourism density (Bed-nights/km2) | Tourism intensity (Bed-nights/resident) |
|-------------------------|-------------------|----------------------|-------------------------------|----------------------------------|-----------------------------------------|
| <b>Budapest</b>         | <b>14,055,480</b> | <b>525.14</b>        | <b>1,751,251</b>              | <b>26,765.2</b>                  | <b>8.0</b>                              |
| District I              | 837,986           | 3.41                 | 25,181                        | 245,743.7                        | 33.3                                    |
| District II             | 443,508           | 36.34                | 89,520                        | 12,204.4                         | 5.0                                     |
| District III            | 332,614           | 39.7                 | 130,809                       | 8,378.2                          | 2.5                                     |
| District IV             | 241,339           | 18.82                | 99,854                        | 12,823.5                         | 2.4                                     |
| District V              | 2,688,192         | 2.59                 | 25,975                        | 1,037,912.0                      | 103.5                                   |
| District VI             | 2,050,451         | 2.38                 | 38,670                        | 861,534.0                        | 53.0                                    |
| District VII            | 2,758,598         | 2.09                 | 51,896                        | 1,319,903.3                      | 53.2                                    |
| District VIII           | 1,240,092         | 6.85                 | 76,784                        | 181,035.3                        | 16.2                                    |
| District IX             | 928,597           | 12.53                | 59,950                        | 74,109.9                         | 15.5                                    |
| District X              | 211,707           | 32.49                | 77,897                        | 6,516.1                          | 2.7                                     |
| District XI             | 602,234           | 33.49                | 148,496                       | 17,982.5                         | 4.1                                     |
| District XII            | 228,391           | 26.67                | 57,640                        | 8,563.6                          | 4.0                                     |
| District XIII           | 823,157           | 13.44                | 121,970                       | 61,246.8                         | 6.7                                     |
| District XIV            | 448,278           | 18.13                | 124,199                       | 24,725.8                         | 3.6                                     |
| District XV             | 25,501            | 26.94                | 79,354                        | 946.6                            | 0.3                                     |
| District XVI            | 14,357            | 33.51                | 74,604                        | 428.4                            | 0.2                                     |
| District XVII           | 3,579             | 54.82                | 87,530                        | 65.3                             | 0.0                                     |
| District XVIII          | 21,282            | 38.6                 | 102,280                       | 551.3                            | 0.2                                     |
| District XIX            | 50,626            | 9.38                 | 59,514                        | 5,397.2                          | 0.9                                     |
| District XX             | 31,631            | 12.19                | 65,079                        | 2,594.8                          | 0.5                                     |
| District XXI            | 13,637            | 25.75                | 75,790                        | 529.6                            | 0.2                                     |
| District XXII           | 12,559            | 34.25                | 55,353                        | 366.7                            | 0.2                                     |
| District XXIII          | 47,164            | 40.77                | 22,906                        | 1,156.8                          | 2.1                                     |
| Descriptive statistics: |                   |                      | Minimum                       | 65.3                             | 0.0                                     |
|                         |                   |                      | Average                       | 168,900.7                        | 13.5                                    |
|                         |                   |                      | Maximum                       | 1,319,903.3                      | 103.5                                   |
|                         |                   |                      | Range                         | 1,319,838.0                      | 103.5                                   |

---

## Questionnaire S1: Survey for experts.

---

Kedves Kollégák!

A Tématerületi Kiválósági Programunk (TKP) egyik alprojektjéhez kérünk szépen egy 5 perces közreműködést. Mindössze annyi lenne a teendő, hogy a mellékelt, 4 kérdésből álló szakértői kérdőívben minimum, közép és maximum értékekre vonatkoztatva becsléseket adjatok. Megnyitás és kitöltés után egyszerűen mentsétek el és mellékletként küldjétek nekem postafordultával vissza. Természetesen az eredményeket teljes mértékben összesítetten, anonim módon közöljük.

Előre is Köszönöm.

Dear colleagues!

For one of the sub-projects of our Thematic Program of Excellence (TKP), we kindly ask for a 5-minute contribution. All you need to do is provide estimates for the minimum, central and maximum value of the 4 attached questions. After opening and filling it out, save it and send it back to me as an attachment. Of course, the results are reported in an aggregated, anonymous manner.

Thank you in advance.

---

## Survey

Based on a survey conducted in 2017 in District VII (see) [1] the **main motivations for visiting Budapest** were visiting...

- Cultural and heritage attractions. **42.7%** of respondents chose this option
- Ruin pubs. **31.0%** of respondents chose this option
- Thermal baths and spas. **29.3%** of respondents chose this option
- Cheap bars and pubs. **29.1%** of respondents chose this option

## Questions

**Question 1.** Considering the previous survey [1], the option **cultural and heritage attractions** was selected by **42.7%** of respondents. In your opinion, what approximate range of values may be associated with the following types of tourists? Example: Min: 0.35, Center: 0.4, Max: 0.45.

|                                                                 | Minimum | Center | Maximum |
|-----------------------------------------------------------------|---------|--------|---------|
| Tourists staying in commercial accommodation - hotels           |         |        |         |
| Tourists staying in commercial accommodation (excluding hotels) |         |        |         |
| Tourists staying in private accommodation                       |         |        |         |

**Question 2.** Considering again the previous survey [1], the option **thermal baths and spas** was selected by **23.9%** of respondents. In your opinion, what approximate range of values may be associated with the following types of tourists?

|                                                                 | Minimum | Center | Maximum |
|-----------------------------------------------------------------|---------|--------|---------|
| Tourists staying in commercial accommodation - hotels           |         |        |         |
| Tourists staying in commercial accommodation (excluding hotels) |         |        |         |
| Tourists staying in private accommodation                       |         |        |         |

**Question 3.** According to the information collected from the HCSO, the estimated amount of waste generated by a single resident in Budapest during 2019 was **0.75 kg/per day**. In your opinion, what approximate range of values may be associated with the following types of tourists?

|                                                                 | Minimum | Center | Maximum |
|-----------------------------------------------------------------|---------|--------|---------|
| Tourists staying in commercial accommodation - hotels           |         |        |         |
| Tourists staying in commercial accommodation (excluding hotels) |         |        |         |
| Tourists staying in private accommodation                       |         |        |         |

**Question 4.** According to the information provided by BKV Zrt., in Budapest (2019), the estimated daily maximum capacity of buses, trams, trolleybuses and the metro was **3,898,800 persons/day**. In your opinion, and based on this value, what would the ideal range of public transportation that is dedicated to tourists be from a sustainability perspective? Please provide your values in percentage form.

|                       | Minimum | Center | Maximum |
|-----------------------|---------|--------|---------|
| All types of tourists |         |        |         |

## References

1. Pinke-Sziva, I.; Smith, M.; Olt, G.; Berezvai, Z. Overtourism and the Night-Time Economy: A Case Study of Budapest. *Int. J. Tour. Cities* **2019**, *5*, 1–16, doi:10.1108/IJTC-04-2018-0028.
